# Supplementary material for: Predictive Biomarkers for Response to Immunotherapy in Triple Negative Breast Cancer: Promises and Challenges
Source: MDPI journal article supplement (doi:10.3390/jcm12030953), 2023-01-26
Supplement: s1 [file s1]

**Supplementary Table S1:** Description of major clinical trials assessing ICIs in metastatic TNBC with biomarkers assessment.

|                                                       | <b>PCD4989g</b>                                                                                               | <b>TONIC</b>                                                                                                                                                                   | <b>Keynote 086</b>                                                                                                                                     | <b>Keynote 119</b>                                                                                                        | <b>Keynote 355</b>                                                                                                                                 | <b>IMpassion 130</b>                                             | <b>IMpassion 131</b>                                             |
|-------------------------------------------------------|---------------------------------------------------------------------------------------------------------------|--------------------------------------------------------------------------------------------------------------------------------------------------------------------------------|--------------------------------------------------------------------------------------------------------------------------------------------------------|---------------------------------------------------------------------------------------------------------------------------|----------------------------------------------------------------------------------------------------------------------------------------------------|------------------------------------------------------------------|------------------------------------------------------------------|
| <b>Study Design</b>                                   | Phase Ib                                                                                                      | Phase II                                                                                                                                                                       | Phase II                                                                                                                                               | Phase III                                                                                                                 | Phase III                                                                                                                                          | Phase III                                                        | Phase III                                                        |
|                                                       | NCT01375842                                                                                                   | NCT02499367                                                                                                                                                                    | NCT02447003                                                                                                                                            | NCT02555657                                                                                                               | NCT02819518                                                                                                                                        | NCT02425891                                                      | NCT03125902                                                      |
|                                                       | Atezolizumab monotherapy                                                                                      | Randomization into 5 arms:<br>-Nivolumab without induction<br>-Radiotherapy + nivolumab<br>-Cyclophosphamide + nivolumab<br>-Cisplatin + nivolumab<br>-Doxorubicin + nivolumab | Pembrolizumab monotherapy                                                                                                                              | Pembrolizumab monotherapy vs chemotherapy of choice of investigator (capecitabine, eribulin, gemcitabine, or vinorelbine) | Pembrolizumab and chemotherapy of choice of investigator (nabpaclitaxel, paclitaxel, or gemcitabine plus carboplatin) vs placebo and chemotherapy) | Atezolizumab and nab-paclitaxel vs nab-paclitaxel and placebo    | Atezolizumab and paclitaxel vs paclitaxel and placebo            |
|                                                       | N = 116                                                                                                       | N = 70<br>Maximum of 3 previous line of systemic treatment                                                                                                                     | N = 254 (all patients)<br>Cohort A (previously treated patients), N = 170<br>Cohort B (previously untreated patients and PD-L1 positive tumor), N = 84 | N = 622<br>Previously treated patients with an anthracycline or a taxane in the (neo)adjuvant or metastatic setting       | N = 847<br>Previously treated patients with (neo)adjuvant setting allowed                                                                          | N = 902                                                          | N = 651                                                          |
| <b>Prior line(s) of therapy in metastatic setting</b> | No prior therapy:<br>N = 21 (18%)<br>1 prior therapy:<br>N = 28 (24%)<br>≥ 2 prior therapies:<br>N = 67 (58%) | No prior therapy:<br>N = 17 (24%)<br>1 prior therapy:<br>N = 34 (49%)<br>≥ 2 prior therapies:<br>N = 19 (27%)                                                                  | 1 prior therapy:<br>N = 53 (31.2%)<br>2 prior therapies:<br>N = 43 (25.3%)<br>≥3 prior therapies:<br>N = 74 (43.5%)                                    | 1 prior therapy:<br>N = 374 (60%)<br>2 prior therapies:<br>N = 247 (40%)                                                  | No previous chemotherapy or targeted therapy for metastatic TNBC                                                                                   | No previous chemotherapy or targeted therapy for metastatic TNBC | No previous chemotherapy or targeted therapy for metastatic TNBC |
| <b>Biopsy requirement for</b>                         | Newly collected biopsy or archival tissue                                                                     | Newly collected biopsy at baseline, post-induction and                                                                                                                         | Newly collected biopsy (mostly from metastases):<br>N = 146 (75%)                                                                                      | Newly collected biopsy or archival tissue allowed                                                                         | Newly collected biopsy or archival tissue                                                                                                          | Newly collected biopsy or archival tissue:                       | Newly collected biopsy or archival tissue:                       |

|                                  |                                                                                                           |                                                                                                                           |                                                                          |                                                                                                       |                                                                             |                                                                                                                                                                                                                                           |                                                                                                                                                                      |
|----------------------------------|-----------------------------------------------------------------------------------------------------------|---------------------------------------------------------------------------------------------------------------------------|--------------------------------------------------------------------------|-------------------------------------------------------------------------------------------------------|-----------------------------------------------------------------------------|-------------------------------------------------------------------------------------------------------------------------------------------------------------------------------------------------------------------------------------------|----------------------------------------------------------------------------------------------------------------------------------------------------------------------|
| <b>biomarker assessment</b>      |                                                                                                           | during immunotherapy                                                                                                      | Archival tissue (mostly from primary breast tumors):<br>N = 47 (25%)     |                                                                                                       |                                                                             | Primary breast tumor samples: N = 563<br>Metastatic tumor samples: N = 337                                                                                                                                                                | Primary breast tumor samples: N = 336<br>Metastatic tumor samples: N = 315                                                                                           |
| <b>PD-L1 testing and scoring</b> | IHC Ventana SP142<br>PD-L1 scored on ICs:<br>IC0 <1%<br>IC1 ≥1% and <5%<br>IC2 ≥ 5% and <10%<br>IC3 ≥ 10% | IHC 22C3                                                                                                                  | IHC 22C3<br>Positive if CPS ≥ 1                                          | IHC 22C3<br>Positive if CPS ≥1                                                                        | IHC 22C3<br>Positive if CPS ≥ 1 and CPS ≥ 10                                | IHC Ventana SP142<br>Positive if PD-L1 IC ≥ 1%                                                                                                                                                                                            | IHC Ventana SP142<br>Positive if PD-L1 IC ≥ 1%                                                                                                                       |
| <b>PD-L1 population</b>          | IC0: N = 21 (18%)<br>IC1: N = 17 (15%)<br>IC2: N = 49 (42%)<br>IC3: N = 25 (22%)                          | PD-L1 IC ≥ 1%: N = 60 (86%)<br>PD-L1 IC ≥ 5%: N = 47 (67%)<br>PD-L1 TC ≥ 1%: N = 44 (63%)<br>PD-L1 TC ≥ 5 %: N = 23 (33%) | Cohort A<br>CPS ≥ 1: N = 105 (62%)<br>Cohort B<br>CPS ≥ 1: N = 84 (100%) | CPS < 1: N = 217 (35%)<br>CPS ≥1: N = 405 (65%)<br>CPS ≥ 10: N = 194 (31%)<br>CPS ≥ 20: N = 109 (18%) | CPS < 1: N = 211 (25%)<br>CPS ≥ 1: N = 636 (75%)<br>CPS ≥ 10: N = 323 (38%) | PD-L1 IC ≥ 1%: N = 368 (41%)<br>PD-L1 IC ≥1% and <5%: N = 243 (27%)<br>PD-L1 IC ≥ 5%: N = 125 (14%)<br>Primary breast tumor samples N = 563<br>PD-L1 ≥ 1%: N = 247 (44%)<br>Metastatic tumor samples N = 337<br>PD-L1 ≥ 1%: N = 121 (36%) | PD-L1 IC ≥ 1%: N = 292 (44.8%)<br>Primary breast tumor samples N = 336<br>PD-L1 ≥ 1%: N = 161 (48%)<br>Metastatic tumor samples N = 315<br>PD-L1 ≥ 1%: N = 132 (42%) |
| <b>TILs population</b>           | N = 110<br>Median IC level distribution 10% (range = 0.5-60%)                                             | sTILs ≥ 5%: N = 39                                                                                                        | Median sTILs level = 17.5% (range 6.2-57.5%)                             | N = 536<br>Median sTILs distribution 5% (IQR = 14%)                                                   | NR                                                                          | N = 892<br>Median sTILs distribution 5% (IQR = 3%-10%; range = 0%-90%)                                                                                                                                                                    | NR                                                                                                                                                                   |
| <b>ORR</b>                       | All lines: 10%<br>Atezolizumab as first line therapy: 24%                                                 | 20%                                                                                                                       | Cohort A: 5.3%<br>Cohort B : 21.4%                                       | Pembrolizumab arm : 9.6%                                                                              | Pembrolizumab arm: 40.8%<br>Placebo arm : 37.0%                             | Atezolizumab arm : 56%<br>Placebo arm : 45.9%                                                                                                                                                                                             | Atezolizumab arm : 54%<br>Placebo arm : 47%                                                                                                                          |

|                           |                                                                                                                                          |                                                                                                                                                                      |                                                                                            |                                                                                                         |                                                                                                       |                                                                                                                   |                                                                                             |
|---------------------------|------------------------------------------------------------------------------------------------------------------------------------------|----------------------------------------------------------------------------------------------------------------------------------------------------------------------|--------------------------------------------------------------------------------------------|---------------------------------------------------------------------------------------------------------|-------------------------------------------------------------------------------------------------------|-------------------------------------------------------------------------------------------------------------------|---------------------------------------------------------------------------------------------|
|                           | Atezolizumab as second line or beyond: 11%                                                                                               |                                                                                                                                                                      |                                                                                            | Chemotherapy arm : 10.6%                                                                                |                                                                                                       |                                                                                                                   |                                                                                             |
| <b>mPFS</b>               | 1.4 months (95% CI 1.3-1.6)                                                                                                              | 1.9 months (95% CI 1.8-2.0)                                                                                                                                          | Cohort A : 2.0 months (95% CI 1.9-2.0)<br>Cohort B : 2.1 months (95% CI 2.0-2.2)           | Pembrolizumab arm : 2.1 months<br>Chemotherapy arm : 3.3 months<br>HR = 1.60 (95% CI 1.33-1.92)         | Pembrolizumab arm : 7.5 months<br>Placebo arm : 5.6 months<br>HR = 0.82 (95% CI: 0.69-0.97)           | Atezolizumab arm : 7.2 months<br>Placebo arm : 5.5 months<br>HR = 0.79 (95% CI 0.69-0.91)<br>P = 0.002            | Atezolizumab arm : 5.7 months<br>Placebo arm : 5.6 months<br>HR = 0.86(95% CI 0.70-1.05)    |
| <b>mOS</b>                | 8.9 months (95% CI 7.0-12.6)                                                                                                             |                                                                                                                                                                      | Cohort A : 9.0 months (95% CI 7.6-11.2)<br>Cohort B : 18.0 months (95% CI 12.9-23.0)       | Pembrolizumab arm : 9.9 months<br>Chemotherapy arm : 10.8 months<br>HR = 0.97 (95% CI 0.82-1.15)        | Pembrolizumab arm : 17.2 months<br>Placebo arm : 15.5 months<br>HR = 0.89 (95% CI 0.76-1.05)          | Atezolizumab arm : 21 months<br>Placebo arm : 18.7 months<br>HR = 0.86 (95% CI 0.72-1.02)                         | Atezolizumab arm : 22.1 months<br>Placebo arm : 28.3 months<br>HR = 1.11 (95% CI 0.76-1.64) |
| <b>SUBGROUPS ANALYSIS</b> |                                                                                                                                          |                                                                                                                                                                      |                                                                                            |                                                                                                         |                                                                                                       |                                                                                                                   |                                                                                             |
| <b>PD-L1</b>              | IC 0/1 or IC 2/3                                                                                                                         | Responders or non-responders                                                                                                                                         | Cohort A: CPS ≥ 1 or < 1                                                                   | CPS ≥ 1, 10 or 20: Pembrolizumab vs chemo arm                                                           | CPS ≥ 1 or ≥10: Pembrolizumab vs placebo arm                                                          | IC ≥ 1% or < 1%: Atezolizumab vs placebo arm                                                                      | IC ≥ 1%: Atezolizumab vs placebo arm                                                        |
| <b>ORR</b>                | IC 0/1: ORR = 5% (95% CI 1.0-18.0)<br>IC 2/3: ORR = 12% (95% CI 6.0-22.0)                                                                | Responders: PD-L1 IC ≥ 1% = 15%<br>Non-responders: PD-L1 IC ≥ 1% = 5%<br>P = 0.02<br>Responders: PD-L1 TC ≥ 1% = 1%<br>Non-responders: PD-L1 TC ≥ 1% = 1%<br>P = 0.4 | CPS ≥ 1: ORR = 5.7% (95% CI 2.4-12.2)<br>CPS < 1: ORR = 4.7% (95% CI 1.1-13.4)             | CPS ≥ 1: ORR = 12.3 vs 9.4 %<br>CPS ≥ 10: ORR = 17.7 vs 9.2%<br>CPS ≥ 20: ORR = 26.3 vs 11.5 %          | CPS ≥ 1: ORR = 44.9 vs 38.9%<br>CPS ≥ 10: ORR = 52.7 vs 40.8%                                         | PD-L1 IC ≥ 1%: ORR = 58.9% vs 42.6%<br>HR = 1.96<br>95% CI 1.29-2.98                                              | PD-L1 IC ≥ 1%: ORR = 63% vs 55%                                                             |
| <b>mPFS</b>               | IC 0/1: mPFS = 1.4 months (95% CI 1.3-1.5)<br>IC 2/3: mPFS = 1.4 months (95% CI 1.3-1.9)<br>IC 1/2/3: mPFS = 1.4 months (95% CI 1.3-1.9) | NR                                                                                                                                                                   | CPS ≥ 1: mPFS = 2.0 months (95% CI 1.9-2.1)<br>CPS < 1: mPFS = 1.9 months (95% CI 1.7-2.0) | CPS ≥ 1: mPFS = 2.1 vs 3.1 months<br>HR = 1.35 (95% CI 1.08-1.68)<br>CPS ≥ 10: mPFS = 2.1 vs 3.4 months | CPS <1: mPFS = 6.3 vs 6.2 months<br>HR = 1.08 (95% CI 0.77-1.53)<br>CPS ≥ 1: mPFS = 7.6 vs 5.6 months | PD-L1 IC ≥ 1%: mPFS = 7.6 vs 5.3 months<br>HR = 0.65 (95% CI 0.52-0.82)<br>PD-L1 IC <1%: mPFS = 5.6 vs 5.6 months | PD-L1 ≥ 1%: mPFS = 6 vs 5.7 months<br>HR = 0.82 (95% CI 0.60-1.12)                          |

|             |                                                                                                         |                                                                      |                                                                                                                                                                                                            |                                                                                                                                                                                                                                                |                                                                                                                                                                                                                             |                                                                                                                                                     |                                                                       |
|-------------|---------------------------------------------------------------------------------------------------------|----------------------------------------------------------------------|------------------------------------------------------------------------------------------------------------------------------------------------------------------------------------------------------------|------------------------------------------------------------------------------------------------------------------------------------------------------------------------------------------------------------------------------------------------|-----------------------------------------------------------------------------------------------------------------------------------------------------------------------------------------------------------------------------|-----------------------------------------------------------------------------------------------------------------------------------------------------|-----------------------------------------------------------------------|
|             |                                                                                                         |                                                                      |                                                                                                                                                                                                            | HR = 1.14 (95% CI 0.82-1.59)<br>CPS ≥ 20: mPFS = 3.4 vs 2.4 months<br>HR = 0.76 (95% CI 0.49-1.18)                                                                                                                                             | HR = 0.74 (95% CI 0.61-0.90)<br>CPS ≥ 10: mPFS = 9.7 vs 5.6 months<br>HR = 0.66 (95% CI 0.50-0.88)                                                                                                                          | HR = 0.92 (95% CI 0.77-1.10)                                                                                                                        |                                                                       |
| <b>mOS</b>  | IC 0/1: mOS = 7.0 months (95% CI 5.1-12.6)<br>IC 2/3: mOS = 10.5 months (95% CI 7.1-14.7)               | NR                                                                   | CPS ≥ 1: mOS = 8.8 months (95% CI 7.1-11.2)<br>CPS < 1: mOS = 9.7 months (95% CI 6.2-12.6)                                                                                                                 | CPS ≥ 1: mOS = 10.7 vs 10.2 months<br>HR 0.86 (95% CI 0.69-1.06)<br>P = 0.073<br>CPS ≥ 10: mOS = 12.7 vs 11.6 months<br>HR 0.78(95% CI 0.57-1.06)<br>P = 0.057<br>CPS ≥ 20: mOS = 14.9 vs 12.5 months<br>HR = 0.58 (95% CI 0.38-0.88) P = 0.50 | CPS < 1: mOS = 16.2 vs 14.7 months<br>HR = 0.97 (95% CI 0.72-1.32)<br>CPS ≥ 1: mOS = 17.6 vs 16.0 months<br>HR = 0.86 (95% CI 0.72-1.04)<br>P = 0.0563<br>CPS ≥ 10: mOS = 23 vs 16.1 months<br>HR = 0.73 (95% CI 0.55-0.95) | PD-L1 IC ≥ 1%: mOS = 25.0 vs 18.0 months<br>HR = 0.71 (95% CI 0.54-0.94)<br>PD-L1 IC <1%: mOS = 19.7 vs 19.6 months<br>HR = 0.97 (95% CI 0.78-1.20) | PD-L1 ≥ 1%: mOS = 15.2 vs 15.8 months<br>HR = 1.11 (95% CI 0.76-1.64) |
| <b>TILs</b> | ICs level > 10% or ≤ 10%                                                                                | Responders or non-responders                                         | TILs ≥ or < median                                                                                                                                                                                         | TILs as continuous variable                                                                                                                                                                                                                    | NR                                                                                                                                                                                                                          | sTIL ≥ 10% or < 10%: Atezolizumab vs placebo arm                                                                                                    | NR                                                                    |
| <b>ORR</b>  | Median ICs level > 10%: ORR = 13% (95% CI 4.0-22.0)<br>Median ICs level ≤ 10%: ORR = 7% (95% CI 0-14.0) | Responders: sTILs = 22.5%<br>Non-responders: sTILs = 5%<br>P = 0.004 | Cohort A :<br>Median Tils = 5%<br>Median sTILs 5%:<br>ORR = 6%<br>Median sTILs < 5%:<br>ORR = 2%<br>Cohort B:<br>Median sTILs = 17.5%<br>Median sTILs ≥ 17.5%: ORR = 39%<br>Median sTILs < 17.5%: ORR = 9% | Pembrolizumab arm<br>ORR = 9.2%<br>P = 0.0007<br>Chemotherapy arm:<br>ORR = 11%<br>P = 0.18                                                                                                                                                    | NR                                                                                                                                                                                                                          | NR                                                                                                                                                  | NR                                                                    |

|             |                                                                                     |                                                                                                                          |    |                                                                                                                                 |    |                                                                                                                                                |    |
|-------------|-------------------------------------------------------------------------------------|--------------------------------------------------------------------------------------------------------------------------|----|---------------------------------------------------------------------------------------------------------------------------------|----|------------------------------------------------------------------------------------------------------------------------------------------------|----|
| <b>mPFS</b> | ICs level > 10% vs ≤ 10%<br>HR = 0.76 (95% CI 0.51-1.14) P = 0.1855                 | NR                                                                                                                       | NR | NR                                                                                                                              |    | sTILs ≥ 10%: mPFS = 8.3 vs 6.1 months<br>HR = 0.64 (95% CI 0.50-0.84)<br>sTILs < 10%: mPFS = 5.6 vs 5.4 months<br>HR = 0.86 (95% CI 0.73-1.02) | NR |
| <b>mOS</b>  | ICs level > 10% vs ≤ 10%<br>HR = 0.63 (95% CI 0.40-0.98) P = 0.0406                 | NR                                                                                                                       | NR | sTILs < 5% or ≥ 5%:<br>Pembrolizumab vs chemo arm<br>TILs < 5%: mOS = 5.9 vs 8.8 months<br>TILs ≥ 5%: mOS = 12.5 vs 11.3 months | NR | sTILs ≥ 10%: mOS = 25 vs 20 months<br>HR = 0.75 (95% CI 0.54-1.03)<br>sTILs < 10%: mOS = 19.2 vs 18.1 months<br>HR = 0.88 (95% CI 0.72-1.08)   | NR |
| <b>CD8</b>  | CD8+ ≥ 1.35% or < 1.35%                                                             | Responders or non-responders                                                                                             | NR | NR                                                                                                                              | NR | CD8+ ≥ 0.5% vs < 0.5%: Atezolizumab vs placebo arm                                                                                             | NR |
| <b>ORR</b>  | CD8+ ≥ 1.35%: ORR = 14% (95% CI 4.0-23.0)<br>CD8+ < 1.35%: ORR = 6% (95% CI 0-12.0) | Responders: CD8+ counts per mm <sup>2</sup> = 49.3<br>Non-responders: CD8+ counts per mm <sup>2</sup> = 25.5<br>P = 0.01 | NR | NR                                                                                                                              | NR | NR                                                                                                                                             | NR |
| <b>mPFS</b> | HR = 0.85<br>95% CI 0.55-1.31<br>P = 0.46                                           | NR                                                                                                                       | NR | NR                                                                                                                              | NR | CD8+ ≥ 0.5%: mPFS = 7.4 vs 5.5 months<br>HR = 0.75 (95% CI 0.62-0.91)<br>CD8+ < 0.5%: mPFS = 5.6 vs 5.6 months<br>HR = 0.86 (95% CI 0.65-1.14) | NR |
| <b>mOS</b>  | HR = 0.68 (95% CI 0.41-1.12) P = 0.13                                               | NR                                                                                                                       | NR | NR                                                                                                                              | NR | CD8+ ≥ 0.5%: mOS = 22.6 vs 18.1 months                                                                                                         | NR |

|             |    |                                                                                               |    |                                                                                                      |    |                                                                                                                           |    |
|-------------|----|-----------------------------------------------------------------------------------------------|----|------------------------------------------------------------------------------------------------------|----|---------------------------------------------------------------------------------------------------------------------------|----|
|             |    |                                                                                               |    |                                                                                                      |    | HR = 0.69 (95% CI 0.54-0.87)<br>CD8+ < 0.5%: mOS = 16.3 vs 22.3 months<br>HR = 1.16 (95% CI 0.81-1.65)                    |    |
| <b>TMB</b>  | NR | Responders or non-responders                                                                  | NR | Pembrolizumab or chemo arm                                                                           | NR | NR                                                                                                                        | NR |
| <b>ORR</b>  | NR | Responders: median TMB (mut/Mb) = 1.2<br>Non-responders: median TMB (mut/Mb) = 1.9<br>P = 0.1 | NR | Pembro arm: ORR= 0.58 (95% CI 0.43-0.73) P = 0.154<br>Chemo arm: ORR=0.43 (95% CI 0.27-0.59) P=0.114 | NR | NR                                                                                                                        | NR |
| <b>mPFS</b> | NR | NR                                                                                            | NR | NR                                                                                                   | NR | PD-L1 positive or negative<br>PD-L1 positive: HR=0.31<br>95% CI 0.17-0.57<br>PD-L1 negative: HR=0.84<br>95% CI 0.48, 1.47 | NR |

TNBC Triple negative breast cancer ; IHC immunohistochemistry ; CPS Combined positive score ; TC Tumor cells ; IC Immune cells ; TILs Tumor infiltrating lymphocytes ; H&E Hematoxylin and eosin ; ORR Overall response rate ; mPFS median Progression free survival ; mOS median overall survival ; sTILs stroma TILs; TMB = tumor mutational burden, NR : not reported

**Supplementary Table S2:** Description of major clinical trials assessing ICIs as neoadjuvant treatment in TNBC with biomarkers assessment.

|                                             | <b>GeparNuevo</b>                                                                                                                                                                                                                     | <b>NeoTRIPaPDL1</b>                                                                                                                                    | <b>Impassion 031</b>                                                                                                                           | <b>Keynote 522</b>                                                                                                                                     |
|---------------------------------------------|---------------------------------------------------------------------------------------------------------------------------------------------------------------------------------------------------------------------------------------|--------------------------------------------------------------------------------------------------------------------------------------------------------|------------------------------------------------------------------------------------------------------------------------------------------------|--------------------------------------------------------------------------------------------------------------------------------------------------------|
| Study Design                                | Phase II<br>Neoadjuvant nab-paclitaxel and durvalumab vs nab-paclitaxel and placebo followed by adjuvant anthracycline and cyclophosphamide chemotherapy<br>Window cohort with one injection of durvalumab before combination therapy | Phase III<br>Neoadjuvant Carboplatin, nab-paclitaxel in association with atezolizumab vs placebo followed by adjuvant anthracycline based chemotherapy | Phase III<br>Neoadjuvant nab-paclitaxel and atezolizumab vs nab-paclitaxel and placebo followed by adjuvant anthracycline and cyclophosphamide | Phase III<br>Neoadjuvant paclitaxel and carboplatine in association with pembrolizumab vs placebo followed adjuvant anthracycline and cyclophosphamide |
| Population                                  | N = 174<br>cT2 to cT4a-d                                                                                                                                                                                                              | N = 280<br>All stage                                                                                                                                   | N = 333<br>cT2–T4 and cN0–cN3                                                                                                                  | N = 1174<br>T1cN1-2 or T2-4N0-2                                                                                                                        |
| Biopsy requirement for biomarker assessment | Pre-treatment biopsy<br>Post-treatment biopsies after durvalumab in window cohort                                                                                                                                                     | Pre-treatment, on-treatment (day 1, cycle 2) biopsy and surgery                                                                                        | Pre-treatment biopsy and surgery                                                                                                               | Pre-treatment biopsy and surgery                                                                                                                       |
| PD-L1 testing and scoring                   | IHC Ventana SP263<br>Positive if PD-L1 TC or IC $\geq$ 1%                                                                                                                                                                             | IHC Ventana SP142<br>PD-L1 scored on IC and TC:<br>IC0 <1%<br>IC1 $\geq$ 1% and <5%<br>IC2 $\geq$ 5% and <10%<br>IC3 $\geq$ 10%                        | IHC Ventana SP142<br>Positive if PD-L1 IC $\geq$ 1%                                                                                            | IHC 22C3<br>Positive if CPS $\geq$ 1                                                                                                                   |
| PD-L1 population                            | PD-L1 positive: N = 138 (87%)                                                                                                                                                                                                         | IC1: N = 91 (32.5%)<br>IC2: N = 48 (17%)                                                                                                               | PD-L1 positive: N = 152 (46%)                                                                                                                  | PD-L1 positive: N = 973 (83%)                                                                                                                          |

|                                |                                                                                                                                                                                                                                                                       |                                                       |                                                     |                                                                             |
|--------------------------------|-----------------------------------------------------------------------------------------------------------------------------------------------------------------------------------------------------------------------------------------------------------------------|-------------------------------------------------------|-----------------------------------------------------|-----------------------------------------------------------------------------|
| TILs population                | sTILs 0-10%: N = 66 (38%)<br>sTILs 11-59%: N = 83 (48%)<br>sTILs ≥ 60%: N = 25 (14%)                                                                                                                                                                                  | sTILs ≥ 40%: N = 59 (34%)                             |                                                     |                                                                             |
| pCR rate                       | Durvalumab vs Placebo<br>Whole cohort<br>53.4 vs 44.2 %<br>OR = 1.45 (95% CI 0.80–2.63)<br>P = 0.224<br>Window cohort<br>61 % vs 41.4 %<br>OR = 2.22 (95% CI 1.06–4.64)<br>P = 0.035<br>No window cohort<br>37.9% vs 50%<br>OR = 0.61 (95% CI 0.21–4.17)<br>P = 0.360 | Atezolizumab vs Placebo<br>52.3 vs 47.7 %<br>P = 0.46 | Atezolizumab vs Placebo<br>58% vs 41%<br>P = 0.0044 | Pembrolizumab vs Placebo<br>64.8% vs 51.2% (95% CI 5.4 - 21.8)<br>P < 0.001 |
| mDFS                           | NR                                                                                                                                                                                                                                                                    | NR                                                    | HR = 0.74<br>95% CI 0.32-1.70<br>P = NS             | DFS at 18 months: 91.3% vs 85.3%<br>HR = 0.63<br>95% CI 0.43 - 0.93         |
| mOS                            | NR                                                                                                                                                                                                                                                                    | NR                                                    | HR = 0.69<br>95% CI 0.25-1.87<br>P = NS             |                                                                             |
| <b>pCR, SUBGROUPS ANALYSIS</b> |                                                                                                                                                                                                                                                                       |                                                       |                                                     |                                                                             |



|       |                                                                                                                                                                                                                                                                                                                                                                                     |                                                                                                                                                                                                                                                                                                                                                                                             |                                                                                                                                                                      |                                                                                                                                                     |
|-------|-------------------------------------------------------------------------------------------------------------------------------------------------------------------------------------------------------------------------------------------------------------------------------------------------------------------------------------------------------------------------------------|---------------------------------------------------------------------------------------------------------------------------------------------------------------------------------------------------------------------------------------------------------------------------------------------------------------------------------------------------------------------------------------------|----------------------------------------------------------------------------------------------------------------------------------------------------------------------|-----------------------------------------------------------------------------------------------------------------------------------------------------|
| PD-L1 | <p>Durvalumab arm: PD-L1 positive vs negative<br/>58% vs 44.4%<br/>OR = 1.72 (95% CI 0.43-6.98)<br/>P = 0.445</p> <p>Placebo arm: PD-L1 positive vs negative<br/>50.7% vs 18.2 %<br/>OR = 4.63 (95% CI 0.93-23.01) P = 0.061</p>                                                                                                                                                    | <p>Atezolizumab vs Placebo arm<br/>IC0 : 35.1% vs 41.1%<br/>IC1 : 56,2% vs 44%<br/>IC2/3 : 87% vs 72%</p>                                                                                                                                                                                                                                                                                   | <p>PD-L1 positive:<br/>Atezolizumab vs Placebo arm<br/>69% vs 49%<br/>P = 0.021</p> <p>PD-L1 negative:<br/>Atezolizumab vs Placebo arm<br/>48% vs 34%<br/>P = NS</p> | <p>PD-L1 positive :<br/>Pembrolizumab vs Placebo arm<br/>68.9% vs 54.9%<br/>PD-L1 negative:<br/>Pembrolizumab vs Placebo arm<br/>45.3% vs 30.3%</p> |
| TILs  | <p>Durvalumab arm<br/>Baseline sTILs as continuous marker<br/>OR = 1.23 (95% CI 1.04-1.6) P = 0.019<br/>Baseline iTILs as continuous marker<br/>OR = 1.58 (95% CI 0.85-2.97) P = 0.150</p> <p>Placebo arm<br/>Baseline sTILs as continuous marker<br/>OR = 1.39 (95% CI 1.12-1.74) P = 0.003<br/>Baseline iTILs as continuous marker<br/>OR = 0.94 (95% CI 0.73-1.22) P = 0.636</p> | <p>Atezolizumab arm<br/>sTILs high vs low<br/>OR = 3.41 (95% CI 1.32-8.82) P = 0.01<br/>sTILs Intermediate vs low<br/>OR = 1.62 (95% CI 0.71-3.74) P = 0.25<br/>iTILs high vs low<br/>OR = 6.84 (95% CI: 2.60-18.01) P = 0.0001<br/>iTILs intermediate vs low<br/>OR = 2.66 (95% CI: 1.13-6.30) P = 0.03</p> <p>Placebo arm<br/>sTILs high vs low OR = 1.76 (95% CI 0.75-4.17) P = 0.19</p> | NR                                                                                                                                                                   | NR                                                                                                                                                  |

|  |  |                                                                                                                                                                                             |  |  |
|--|--|---------------------------------------------------------------------------------------------------------------------------------------------------------------------------------------------|--|--|
|  |  | sTILs Intermediate vs low OR = 0.63 (95% CI 0.26-1.55) P = 0.3<br>iTILs high vs low OR = 2.22 (95% CI 0.95-5.22) P = 0.06<br>iTILs intermediate vs low OR = 1.44 (95% CI 0.59-3.49) P = 0.3 |  |  |
|--|--|---------------------------------------------------------------------------------------------------------------------------------------------------------------------------------------------|--|--|

IHC immunohistochemistry ; TC Tumor cells ; IC Immune cells ; CPS Combined positive score ; TILs Tumor infiltrating lymphocytes ; H&E Hematoxylin and eosin ; pCR pathologic complete response ; OR Odd Ratio ; mDFS median Disease free survival ; NS not significant ; mOS median overall survival ; sTILs stroma TILs ; iTILs intra-tumor TILs ;
